# Supplementary material for: Recognition of DNA damage by XPC coincides with disruption of the XPC–RAD23 complex
Source: PubMed Central journal article supplement — J Cell Biol. 2012 Mar 19;196(6):681–8. doi: 10.1083/jcb.201107050 (PMC3308700; doi:10.1083/jcb.201107050), 2012-03-19
Supplement: supp_jcb.201107050_JCB_201107050_sm.pdf [file supp_jcb.201107050_JCB_201107050_sm.pdf]

Bergink et al., <http://www.jcb.org/cgi/content/full/jcb.201107050/DC1>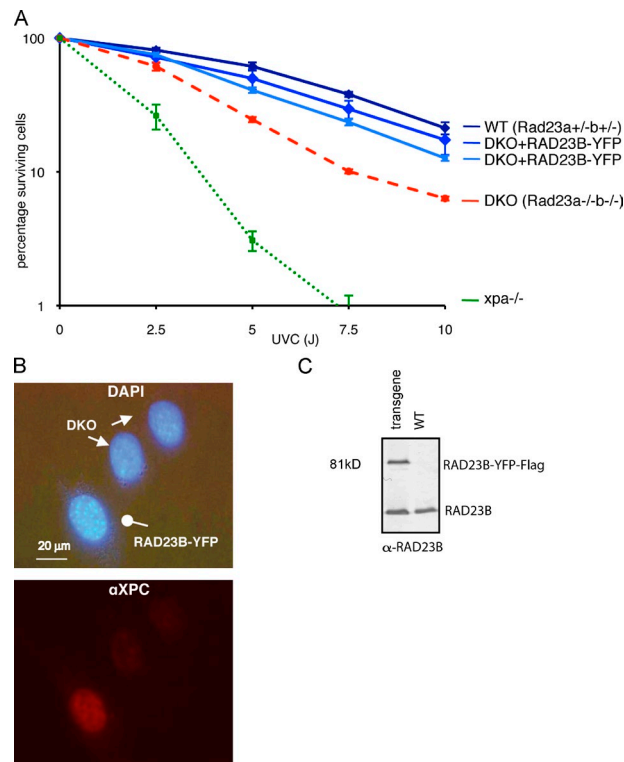

Figure S1. **RAD23B-YFP-FLAG is proficient in NER.** (A) UV colony survival assay of different MEFs, as indicated. Stable RAD23B-YFP-FLAG-expressing clones are not hypersensitive to UV light (similar to WT MEFs), whereas the parental Rad23a/b DKO is moderately UV sensitive compared with the high UV sensitivity of a control, complete NER-deficient Xpa<sup>-/-</sup> MEF. The y axis is in log scale. Survival assays were performed three times ( $n = 3$ ). Error bars indicated SDs. (B) Comparative immunofluorescence analysis of XPC in DKO mixed with DKO cells that stably express RAD23B-YFP (identified by small beads in the cytoplasm; top). Endogenous XPC levels are increased in cells expressing RAD23B-YFP-FLAG in comparison with DKO cells (bottom). DKO cells are indicated with arrows, and DKO cells expressing mRAD23B-YFP are indicated by the blunt arrow. (C) Immunoblot analysis of whole-cell extracts from ES cells with or without two copies of the BAC RAD23B-YFP transgene. The blot is stained with anti-RAD23B ( $\alpha$ -RAD23B) antibodies, and the migration of the fusion protein and endogenous protein is indicated.

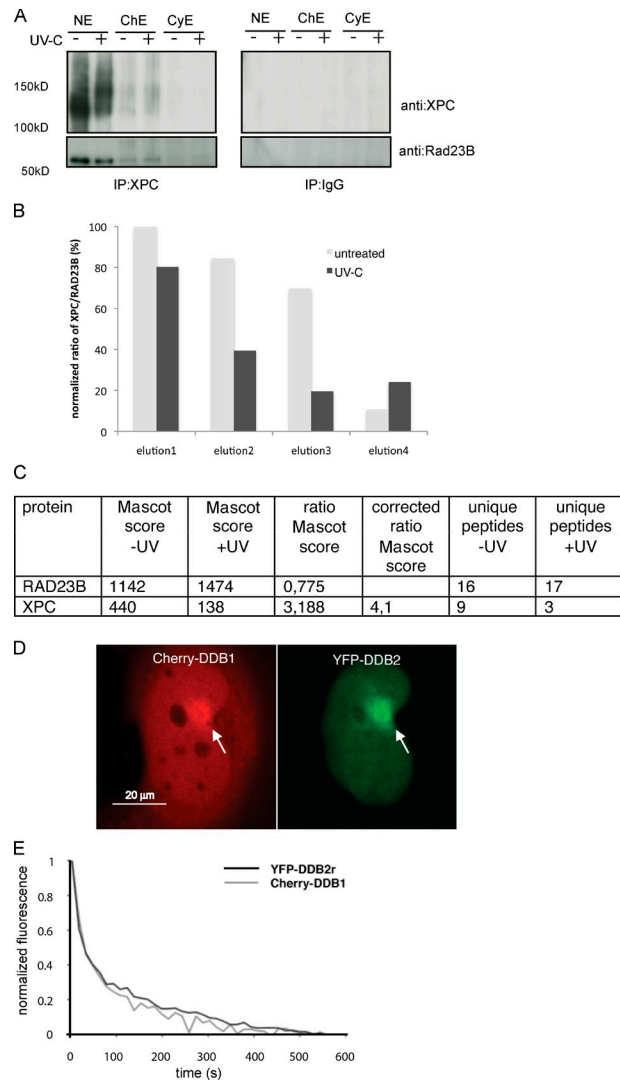

Figure S2. **XPC and RAD23B dissociate upon UV irradiation, whereas DDB1 and DDB2 remain a complex upon binding to damaged DNA.** (A) Immunoprecipitation (IP) of XPC from subcellular fractions soluble nuclear extract (NE), chromatin extract (ChE), and cytoskeletal extract (CyE), as indicated in Fig. 3 A. Less RAD23B coimmunoprecipitates with XPC after UV-C ( $20 \text{ J/m}^2$ ) treatment. Western blots of XPC and RAD23B are shown. Note that after UV, XPC migrates with different (slower) mobilities as compared with XPC isolated from non-UV-damaged cells, most likely a result of polyubiquitination. The loaded amount of precipitated material was adjusted to the total amount of XPC, including the slower migrating species. (B) Quantification of the immunoblot-derived signals as presented in Fig. 3 B. The blots were quantified using ImageGauge software (v4.23; Fujifilm). The ratios of XPC over RAD23B were obtained by dividing the XPC-derived signal with the RAD23B-derived signal after subtraction of the background for each. The different ratios are shown in the graph. (C) Semiquantitative mass spectrometry analysis of RAD23B-YFP-FLAG-XPC complexes isolated from ES cells containing two copies of the RAD23B-YFP-FLAG by immunoprecipitation on FLAG beads and subsequent elution by FLAG peptide. Complexes were isolated from ES cells 1 h after mock or UV treatment; the Mascot scores of RAD23B and XPC are shown. (D) Cells that express both Cherry-DDB1 and YFP-DDB2 were locally damaged with UV-C. Both Cherry-DDB1 and YFP-DDB2 accumulate on the local DNA damage. Arrows indicate the local damaged area. (E) Cells with a local damage containing both Cherry-DDB1 and YFP-DDB2 were subjected to iFRAP analyses, as in Fig. 3 E. DDB1 and DDB2 exhibit a similar dissociation rate from the local damage, indicative for a simultaneous dissociation of these proteins, which is in contrast to the differential dissociation of the RAD23-XPC complex.
